# Supplementary material for: Seroprevalence of SARS-CoV-2 antibody among urban Iranian population: findings from the second large population-based cross-sectional study
Source: Springer Nature journal article supplement (doi:10.1186/s12889-022-13464-7), 2022-05-23
Supplement: MOESM1 [file 22766950]

**Seroprevalence of SARS-CoV-2 antibody among urban Iranian population: findings from the second large population-based cross-sectional study**

Mohammad Zamani<sup>1\*</sup>, Hossein Poustchi<sup>2\*</sup>, Zahra Mohammadi<sup>2</sup>, Sahar Dalvand<sup>2</sup>, Maryam Sharafkhah<sup>2</sup>, Seyed Abbas Motevalian<sup>3,4</sup>, Saeid Eslami<sup>5</sup>, Amir Emami<sup>6</sup>, Mohammad Hossein Somi<sup>7</sup>, Jamshid Yazdani-Charati<sup>8</sup>, Nader Saki<sup>9</sup>, Manoochehr Karami<sup>10,11</sup>, Farid Najafi<sup>12</sup>, Iraj Mohebbi<sup>13</sup>, Nasrollah Veisi<sup>14</sup>, Ahmad Hormati<sup>15,16</sup>, Farhad Pourfarzi<sup>17</sup>, Reza Ghadimi<sup>18</sup>, Alireza Ansari-Moghaddam<sup>19</sup>, Hamid Sharifi<sup>20</sup>, Gholamreza Roshandel<sup>21</sup>, Fariborz Mansour-Ghanaei<sup>22</sup>, Farahnaz Joukar<sup>23</sup>, Amaneh Shayanrad<sup>2</sup>, Sareh Eghtesad<sup>2</sup>, Ahmadreza Niavarani<sup>24</sup>, Alireza Delavari<sup>24</sup>, Soudeh Kaveh<sup>2</sup>, Akbar Feizesani<sup>2</sup>, Melineh Markarian<sup>1</sup>, Fatemeh Shafighian<sup>24</sup>, Alireza Sadjadi<sup>24</sup>, Maryam Darvishian<sup>25</sup>, Reza Malekzadeh<sup>24,1</sup>

\* Denotes joint first author

1. Digestive Diseases Research Center, Digestive Diseases Research Institute, Shariati Hospital, Tehran University of Medical Sciences, Tehran, Iran.
2. Liver and Pancreatobiliary Diseases Research Center, Digestive Diseases Research Institute, Shariati Hospital, Tehran University of Medical Sciences, Tehran, Iran.
3. Research Center for Addiction and Risky Behaviors (ReCARB), Psychosocial Health Research Institute, Iran University of Medical Sciences, Tehran, Iran.
4. Department of Epidemiology, School of Public Health, Iran University of Medical Sciences, Tehran, Iran.
5. Pharmaceutical Research Center, Pharmaceutical Technology Institute, Mashhad University of Medical Sciences, Mashhad, Iran.
6. Microbiology Department, Burn & Wound Healing Research Center, Shiraz University of Medical Sciences, Shiraz, Iran.

7. Liver and Gastrointestinal Diseases Research Center, Tabriz University of Medical Sciences, Tabriz, Iran.
8. Department of Biostatistics, Health Sciences Research Center, Addiction Institute, Faculty of Health, Mazandaran University of Medical Sciences, Sari, Iran.
9. Hearing Research Center, Ahvaz Jundishapur University of Medical Sciences, Ahvaz, Iran.
10. Department of Epidemiology, School of Public Health, Hamadan University of Medical Sciences, Hamadan, Iran.
11. Department of Epidemiology, School of Public Health & Safety, Shahid Beheshti University of Medical Sciences, Tehran, Iran.
12. Research Center for Environmental Determinants of Health, School of Public Health, Kermanshah UMS, Kermanshah, Iran.
13. Social Determinants of Health Center, Urmia University of Medical Sciences, Urmia, Iran.
14. Kurdistan University of Medical Sciences, Sanandaj, Iran.
15. Gastroenterology and Hepatology Disease Research Center, Qom University of Medical Science, Qom, Iran.
16. Department of Internal Medicine, School of Medicine, Gastrointestinal and Liver Diseases Research Center, Iran University of Medical Sciences, Tehran, Iran.
17. Digestive Disease Research Center, Ardabil University of Medical Sciences, Ardabil, Iran.
18. Social Determinants of Health Research Center, Health Research Institute, Babol University of Medical Sciences, Babol, Iran.
19. Health Promotion Research Center, Zahedan University of Medical Sciences, Zahedan, Iran.
20. HIV/STI Surveillance Research Center and WHO Collaborating Center for HIV Surveillance, Institute for Futures Studies in Health, Kerman University of Medical Sciences, Kerman, Iran.
21. Golestan Research Center of Gastroenterology and Hepatology, Golestan University of Medical Sciences, Gorgan, Iran.
22. Division of Gastroenterology & Hepatology, Gastrointestinal & Liver Diseases Research Center, Guilan University of Medical Sciences, Rasht, Iran.
23. Gastrointestinal and Liver Diseases Research Center, Guilan University of Medical Sciences, Rasht, Iran.
24. Digestive Oncology Research Center, Digestive Diseases Research Institute, Shariati Hospital, Tehran University of Medical Sciences, Tehran, Iran.

25. Cancer Control Research, BC Cancer Research Centre, Vancouver, BC, Canada.

**Correspondence to:**

Prof Reza Malekzadeh,

Digestive Diseases Research Institute, Shariati Hospital, Tehran University of Medical Sciences,  
Tehran 14117–13135, Iran

Email: [dr.reza.malekzadeh@gmail.com](mailto:dr.reza.malekzadeh@gmail.com)

Phone: +98 21 824 15 000

**Table S1. Baseline characteristics of study participants by city**

|                   | Population size |        | Sex    | Age (Year) |        |        |        |        |        | Comorbidity condition |          | Contact with COVID-19 patients |         |
|-------------------|-----------------|--------|--------|------------|--------|--------|--------|--------|--------|-----------------------|----------|--------------------------------|---------|
|                   | Total           | Sample | Male   | 10-19      | 20-29  | 30-39  | 40-49  | 50-59  | ≥60    | No                    | Yes (≥1) | No                             | Yes     |
| <b>Overall</b>    | 22420684        | 7411   | 3721   | 362        | 879    | 2202   | 2051   | 1272   | 645    | 5123                  | 2229     | 4739                           | 2557    |
|                   |                 |        | (50.2) | (4.8)      | (11.9) | (29.7) | (27.7) | (17.2) | (8.7)  | (69.7)                | (30.3)   | (65.0)                         | (35.0)  |
| <b>Ahvaz</b>      | 1184788         | 393    | 166    | 6          | 44     | 160    | 111    | 51     | 21     | 248/393               | 145/393  | 246/392                        | 146/392 |
|                   |                 |        | (42.2) | (1.5)      | (11.2) | (40.7) | (28.2) | (13.0) | (5.3)  | (63.1)                | (36.9)   | (62.8)                         | (37.2)  |
| <b>Ardabil</b>    | 529374          | 384    | 197    | 26         | 54     | 108    | 107    | 66     | 23     | 285/384               | 99/384   | 294/383                        | 89/383  |
|                   |                 |        | (51.3) | (6.8)      | (14.1) | (28.1) | (27.9) | (17.2) | (6.0)  | (74.2)                | (25.8)   | (76.8)                         | (23.2)  |
| <b>Babol</b>      | 250217          | 383    | 184    | 13         | 43     | 82     | 95     | 86     | 64     | 242/382               | 140/382  | 248/379                        | 131/379 |
|                   |                 |        | (48)   | (3.4)      | (11.2) | (21.4) | (24.8) | (22.5) | (16.7) | (63.4)                | (36.6)   | (65.4)                         | (34.6)  |
| <b>Gorgan</b>     | 350676          | 330    | 71     | 14         | 30     | 101    | 119    | 47     | 19     | 246/330               | 84/330   | 251/329                        | 78/329  |
|                   |                 |        | (21.5) | (4.2)      | (9.1)  | (30.6) | (36.1) | (14.2) | (5.8)  | (74.5)                | (25.5)   | (76.3)                         | (23.7)  |
| <b>Hamedan</b>    | 554406          | 391    | 234    | 15         | 55     | 89     | 117    | 67     | 48     | 293/391               | 98/391   | 254/390                        | 136/390 |
|                   |                 |        | (59.8) | (3.8)      | (14.1) | (22.8) | (29.9) | (17.1) | (12.3) | (74.9)                | (25.1)   | (65.1)                         | (34.9)  |
| <b>Kerman</b>     | 537718          | 355    | 191    | 14         | 53     | 132    | 81     | 45     | 30     | 266/352               | 86/352   | 250/318                        | 68/318  |
|                   |                 |        | (53.8) | (3.9)      | (14.9) | (37.2) | (22.8) | (12.7) | (8.5)  | (75.6)                | (24.4)   | (78.6)                         | (21.4)  |
| <b>Kermanshah</b> | 946651          | 389    | 203    | 90         | 61     | 89     | 69     | 51     | 29     | 324/386               | 62/386   | 317/386                        | 69/386  |
|                   |                 |        | (52.2) | (23.1)     | (15.7) | (22.9) | (17.7) | (13.1) | (7.5)  | (83.9)                | (16.1)   | (82.1)                         | (17.9)  |
| <b>Mashhad</b>    | 3001184         | 691    | 338    | 0          | 97     | 229    | 222    | 124    | 19     | 464/649               | 185/649  | 333/639                        | 306/639 |

|                 |         |      |        |        |        |        |        |        |        |          |          |          |          |
|-----------------|---------|------|--------|--------|--------|--------|--------|--------|--------|----------|----------|----------|----------|
|                 |         |      | (48.9) | (0.0)  | (14.0) | (33.1) | (32.1) | (17.9) | (2.7)  | (71.5)   | (28.5)   | (52.1)   | (47.9)   |
| <b>Qom</b>      | 1201158 | 385  | 123    | 20     | 70     | 140    | 99     | 39     | 17     | 294/381  | 87/381   | 214/379  | 165/379  |
|                 |         |      | (31.9) | (5.2)  | (18.2) | (36.4) | (25.7) | (10.1) | (4.4)  | (77.2)   | (22.8)   | (56.5)   | (43.5)   |
| <b>Sanandaj</b> | 412767  | 388  | 209    | 57     | 58     | 112    | 75     | 48     | 38     | 249/388  | 139/388  | 253/387  | 134/387  |
|                 |         |      | (53.9) | (14.7) | (14.9) | (28.9) | (19.3) | (12.4) | (9.8)  | (64.2)   | (35.8)   | (65.4)   | (34.6)   |
| <b>Sari</b>     | 309820  | 400  | 232    | 9      | 44     | 109    | 113    | 73     | 52     | 343/400  | 136/400  | 239/399  | 160/399  |
|                 |         |      | (58.0) | (2.3)  | (11.0) | (27.3) | (28.2) | (18.3) | (13.0) | (71.6)   | (28.4)   | (59.9)   | (40.1)   |
| <b>Shiraz</b>   | 1565572 | 485  | 287    | 0      | 63     | 218    | 134    | 57     | 13     | 343/479  | 136/479  | 154/481  | 327/481  |
|                 |         |      | (59.2) | (0.0)  | (13.0) | (44.9) | (27.6) | (11.8) | (2.7)  | (71.6)   | (28.4)   | (32.0)   | (68.0)   |
| <b>Tabriz</b>   | 1558693 | 485  | 223    | 11     | 52     | 165    | 127    | 81     | 49     | 312/485  | 173/485  | 272/485  | 213/485  |
|                 |         |      | (46.0) | (2.3)  | (10.7) | (34.0) | (26.2) | (16.7) | (10.1) | (64.3)   | (35.7)   | (56.1)   | (43.9)   |
| <b>Tehran</b>   | 8693706 | 1181 | 664    | 0      | 58     | 300    | 429    | 317    | 77     | 795/1181 | 386/1181 | 792/1180 | 388/1180 |
|                 |         |      | (56.2) | (0.0)  | (4.9)  | (25.4) | (36.3) | (26.8) | (6.5)  | (67.3)   | (32.7)   | (67.1)   | (32.9)   |
| <b>Urmia</b>    | 736224  | 389  | 200    | 44     | 45     | 94     | 93     | 71     | 42     | 283/389  | 106/389  | 300/387  | 87/387   |
|                 |         |      | (51.4) | (11.3) | (11.6) | (24.2) | (23.9) | (18.3) | (10.8) | (72.8)   | (27.2)   | (77.5)   | (22.5)   |
| <b>Zahedan</b>  | 587730  | 382  | 199    | 43     | 52     | 74     | 60     | 49     | 104    | 220/382  | 162/382  | 322/382  | 60/382   |
|                 |         |      | (52.1) | (11.3) | (13.6) | (19.4) | (15.7) | (12.8) | (27.2) | (57.6)   | (42.4)   | (84.3)   | (15.7)   |

Data are n, n (%), or n/N (%)

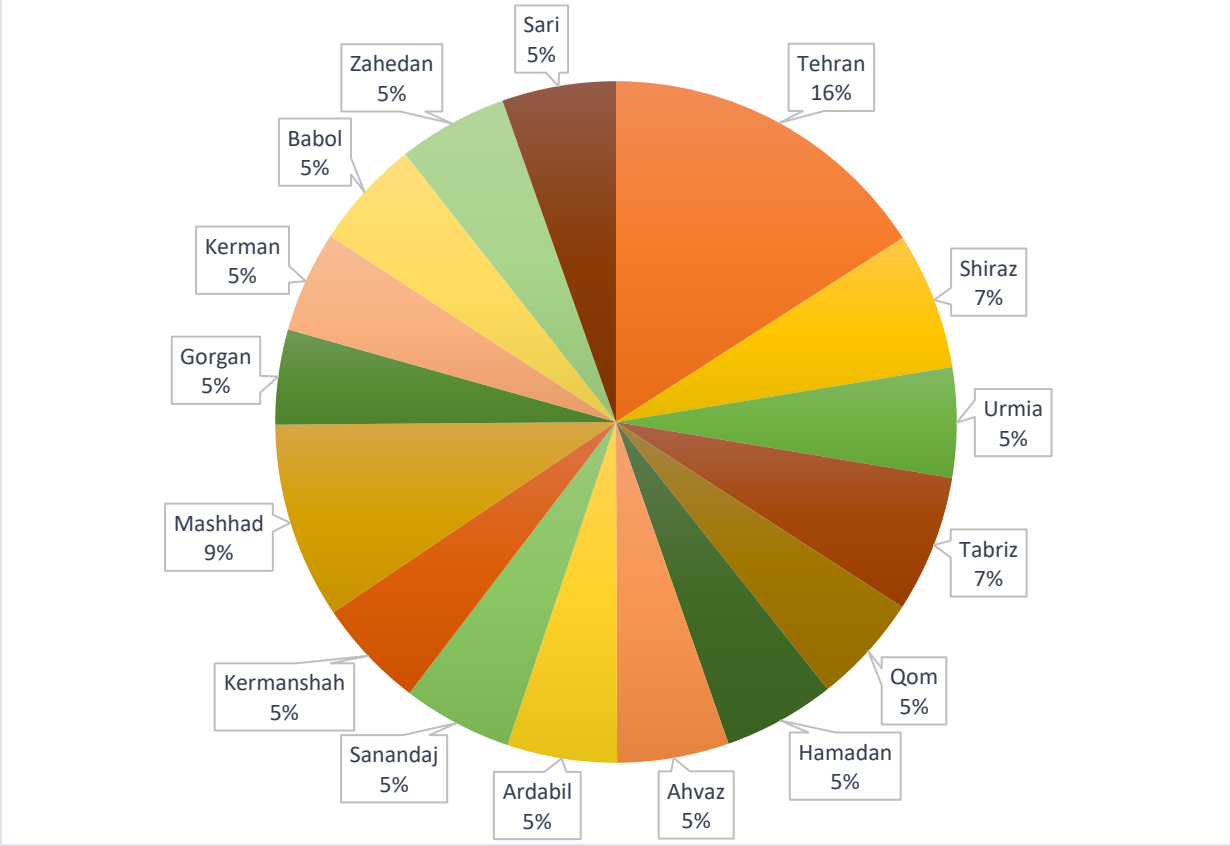

**Figure S1. Distribution of participants across 16 cities studied.**

**First phase**

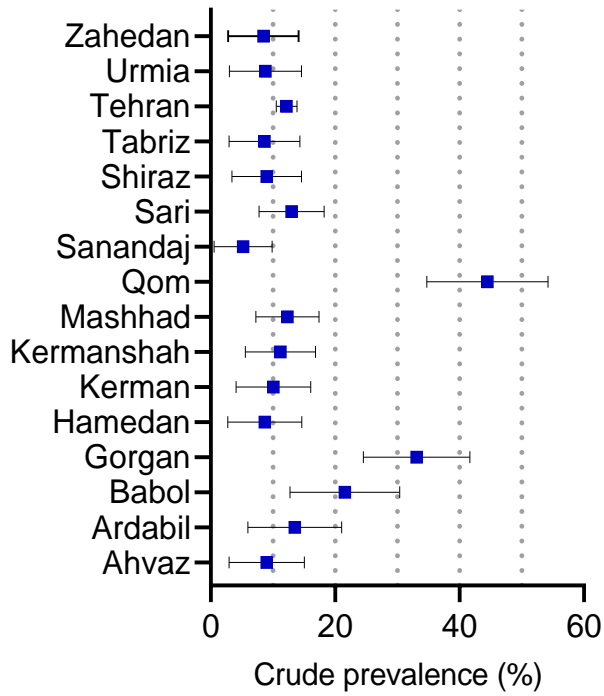

**Second phase**

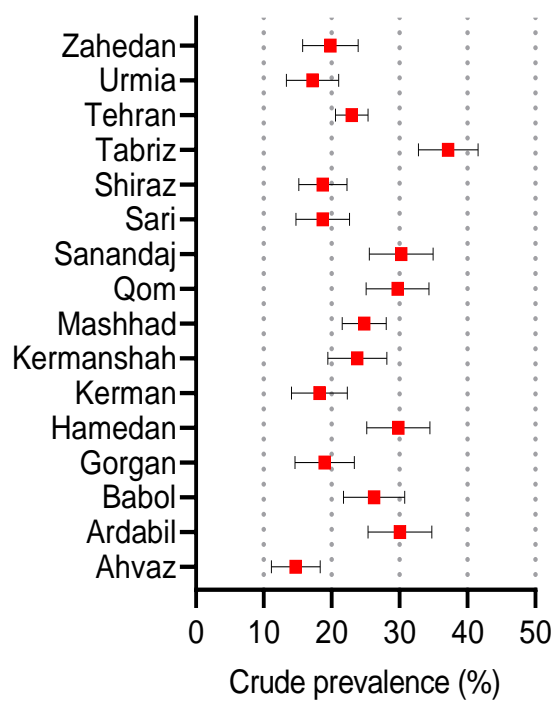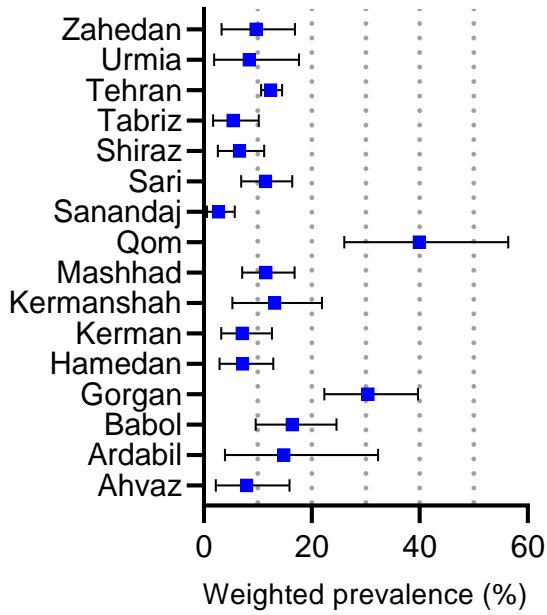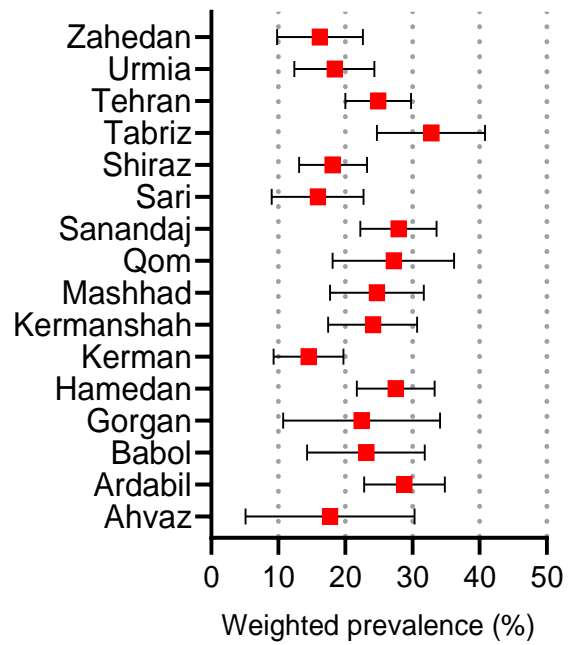

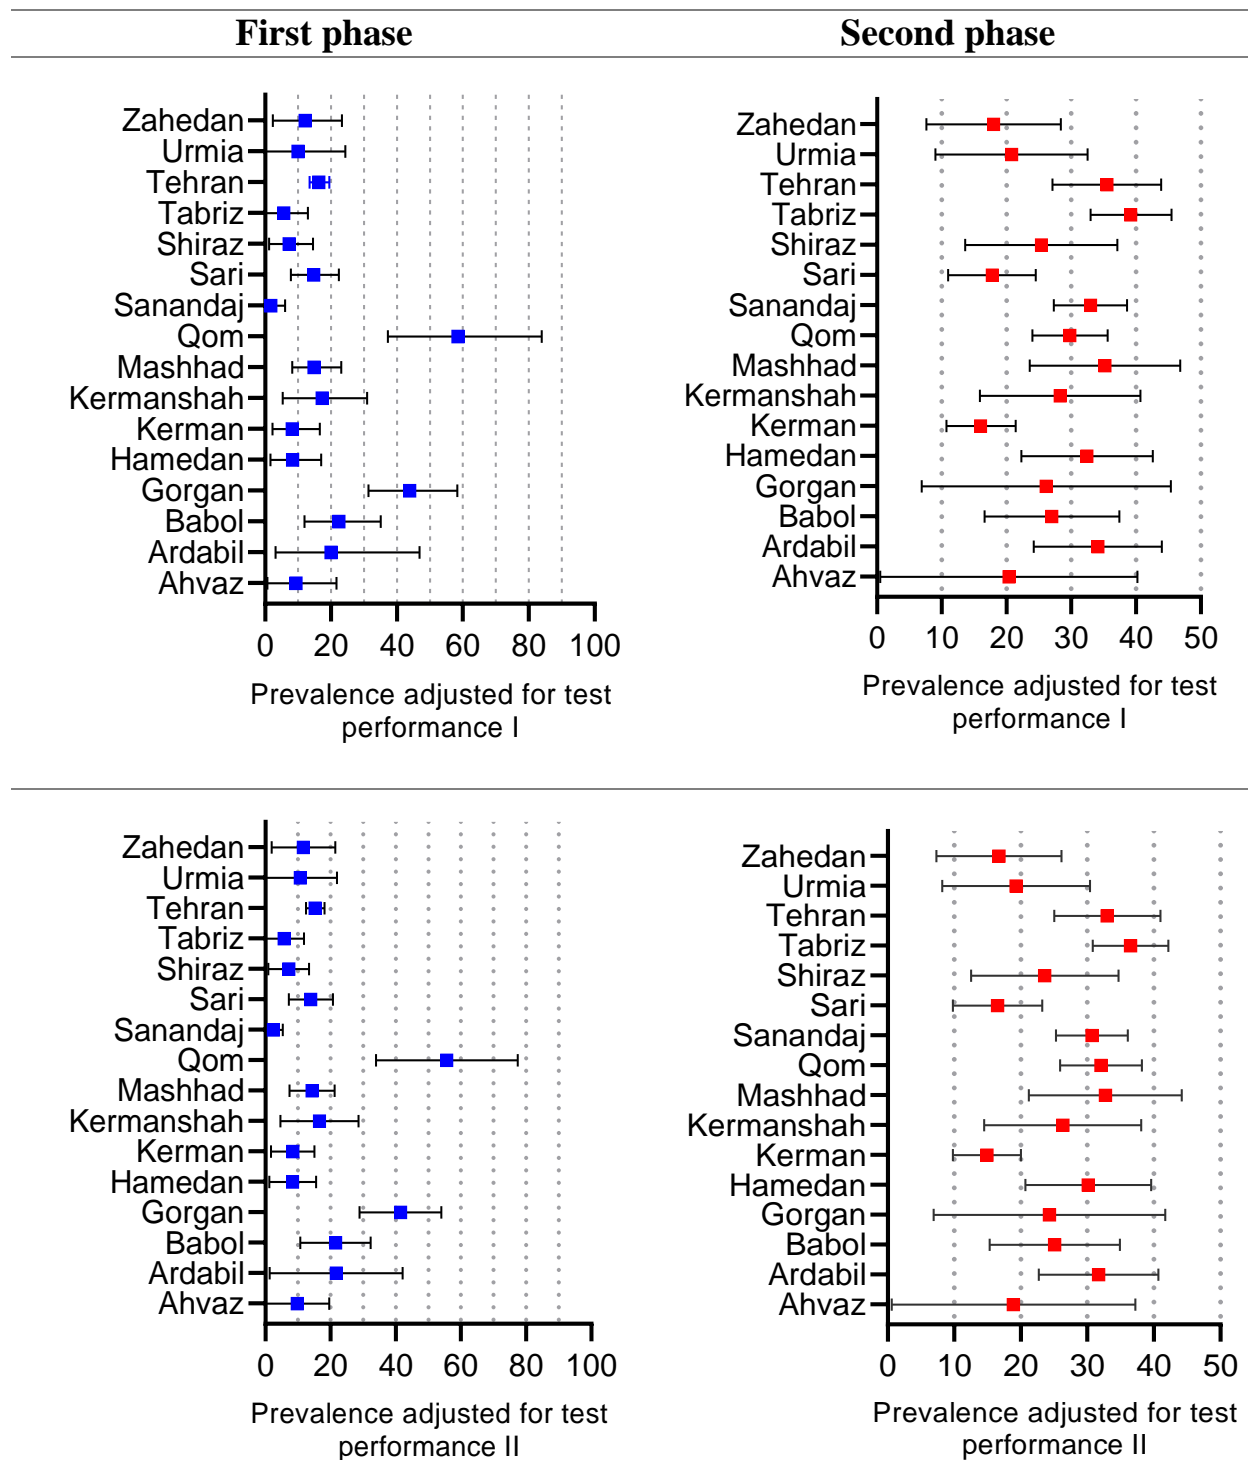

**Figure S2. The crude (unadjusted) prevalence (95% CI), weighted prevalence, adjusted and weighted prevalence for test performance I (sensitivity 66.9% and specificity 98.2%), and adjusted and weighted prevalence for test performance II (sensitivity 71.8% and specificity 98.2%) of first and second phases studies of coronavirus disease in 16 cities of Iran by March 2021.**



**Table S2. Seroprevalence of SARS-COV-2 by antibody positivity.**

|                                | <b>Number</b> | <b>Crude<br/>(95% CI)</b> | <b>Weighted<br/>(95% CI)</b> | <b>Adjusted for test<br/>performance I<br/>(95% CI)</b> | <b>Adjusted for test<br/>performance I<br/>(95% CI)</b> |
|--------------------------------|---------------|---------------------------|------------------------------|---------------------------------------------------------|---------------------------------------------------------|
| <b>IgG positive</b>            | 1570/7411     | 21.2<br>(20.3-22.1)       | 21.2<br>(19.0-23.3)          | 29.9<br>(26.5-33.3)                                     | 27.8<br>(24.7-31.0)                                     |
| <b>IgM positive</b>            | 509/7411      | 6.9<br>(6.3-7.5)          | 6.4<br>(5.0-7.8)             | 7.6<br>(5.6-9.6)                                        | 7.0<br>(5.1-9.0)                                        |
| <b>IgG or IgM<br/>positive</b> | 1764/7411     | 23.8<br>(22.8-24.8)       | 24.0<br>(21.9-26.1)          | 34.2<br>(30.9-37.4)                                     | 31.8<br>(28.6-34.9)                                     |

**Table S3. Seroprevalence of SARS-COV-2 among individuals with and without symptoms.**

| <b>Frequency (%)</b>                  | <b>Status</b> | <b>Frequency (%)</b> | <b>Prevalence of antibody positive (95% CI)</b> | <b>Adjusted prevalence for test performance I (95% CI)†</b> | <b>Adjusted prevalence for test performance II (95% CI)‡</b> |
|---------------------------------------|---------------|----------------------|-------------------------------------------------|-------------------------------------------------------------|--------------------------------------------------------------|
| <b>Cough</b>                          | No            | 6301 (85.7)          | 21.5 (20.5-22.5)                                | 31.1 (28.2-33.9)                                            | 28.9 (26.3-31.5)                                             |
|                                       | Yes           | 1054 (14.3)          | 37.2 (34.3-40.2)                                | 55.3 (40.1-70.4)                                            | 52.0 (36.5-67.4)                                             |
| <b>Fever</b>                          | No            | 6569 (89.3)          | 21.4 (20.4-22.4)                                | 31.1 (27.9-34.3)                                            | 28.9 (26.0-31.8)                                             |
|                                       | Yes           | 786 (10.7)           | 43.4 (39.9-46.9)                                | 62.7 (50.2-75.1)                                            | 58.3 (46.3-70.2)                                             |
| <b>Chills</b>                         | No            | 6686 (90.9)          | 21.7 (20.8-22.7)                                | 31.8 (28.5-35.1)                                            | 29.5 (26.3-32.7)                                             |
|                                       | Yes           | 669 (9.1)            | 43.6 (39.8-47.5)                                | 62.4 (48.2-76.6)                                            | 58.6 (44.7-72.5)                                             |
| <b>Anosmia</b>                        | No            | 6769 (92.0)          | 21.1 (20.2-22.1)                                | 30.9 (27.1-34.6)                                            | 28.7 (25.2-32.2)                                             |
|                                       | Yes           | 586 (8.0)            | 53.7 (49.6-57.8)                                | 75.5 (61.3-89.8)                                            | 72.0 (57.9-86.1)                                             |
| <b>Sore throat</b>                    | No            | 6176 (84.0)          | 22.8 (21.7-23.8)                                | 32.9 (29.6-36.1)                                            | 30.6 (27.4-33.7)                                             |
|                                       | Yes           | 1179 (16.0)          | 28.8 (26.3-31.5)                                | 44.9 (36.1-53.8)                                            | 41.8 (33.5-50.0)                                             |
| <b>Headache</b>                       | No            | 5857 (79.6)          | 22.5 (21.4-23.5)                                | 32.2 (29.2-35.1)                                            | 29.9 (27.2-32.6)                                             |
|                                       | Yes           | 1498 (20.4)          | 28.8 (26.5-31.1)                                | 47.3 (34.6-60.0)                                            | 44.0 (32.3-55.8)                                             |
| <b>Dyspnea</b>                        | No            | 6855 (93.2)          | 22.5 (21.5-23.5)                                | 32.8 (29.6-36.0)                                            | 30.5 (27.4-33.6)                                             |
|                                       | Yes           | 500 (6.8)            | 40.6 (36.3-45.0)                                | 55.7 (41.3-70.2)                                            | 51.8 (38.6-65.0)                                             |
| <b>Diarrhea</b>                       | No            | 6834 (92.9)          | 22.8 (21.8-23.8)                                | 33.3 (29.9-36.7)                                            | 31.0 (28.0-33.9)                                             |
|                                       | Yes           | 521 (7.1)            | 36.1 (31.9-40.4)                                | 53.2 (36.6-69.8)                                            | 50.0 (34.7-65.4)                                             |
| <b>Conjunctivitis</b>                 | No            | 7051 (95.9)          | 23.3 (22.4-24.3)                                | 33.8 (30.2-37.4)                                            | 31.5 (27.9-35.0)                                             |
|                                       | Yes           | 304 (4.1)            | 32.9 (27.6-38.5)                                | 50.0 (36.5-63.5)                                            | 46.5 (34.1-58.8)                                             |
| <b>Weakness</b>                       | No            | 6256 (85.1)          | 21.2 (20.2-22.3)                                | 30.8 (27.9-33.7)                                            | 28.7 (26.0-31.4)                                             |
|                                       | Yes           | 1099 (14.9)          | 37.9 (35.1-40.9)                                | 55.9 (40.8-71.0)                                            | 52.0 (38.2-65.8)                                             |
| <b>Myalgia</b>                        | No            | 6343 (86.2)          | 21.4 (20.4-22.5)                                | 31.2 (28.0-34.4)                                            | 29.0 (25.9-32.2)                                             |
|                                       | Yes           | 1012 (13.8)          | 38.1 (35.1-41.2)                                | 55.0 (45.7-64.4)                                            | 51.2 (42.8-59.5)                                             |
| <b>Arthralgia</b>                     | No            | 6822 (92.8)          | 22.3 (21.3-23.3)                                | 32.3 (29.1-35.5)                                            | 30.1 (27.1-33.0)                                             |
|                                       | Yes           | 533 (7.2)            | 42.8 (38.5-47.1)                                | 60.0 (46.5-73.6)                                            | 55.8 (43.5-68.1)                                             |
| <b>Altered level of consciousness</b> | No            | 7126 (96.9)          | 23.4 (22.4-24.4)                                | 33.9 (30.6-37.2)                                            | 31.5 (28.5-34.5)                                             |
|                                       | Yes           | 229 (3.1)            | 34.9 (28.8-41.5)                                | 57.5 (38.3-76.7)                                            | 54.4 (35.4-73.5)                                             |
| <b>Chest pain</b>                     | No            | 6959 (94.6)          | 22.9 (21.9-23.9)                                | 33.2 (30.1-36.4)                                            | 30.9 (28.2-33.7)                                             |
|                                       | Yes           | 396 (5.4)            | 37.9 (33.1-42.9)                                | 52.7 (37.0-68.4)                                            | 49.6 (34.4-64.8)                                             |

Seroprevalence data are % (95% confidence interval). †Adjusted for test performance I (sensitivity 66.9% and specificity 98.2%). ‡Adjusted for test performance II as reported by manufacturer (sensitivity 71.8% and specificity 98.2%).

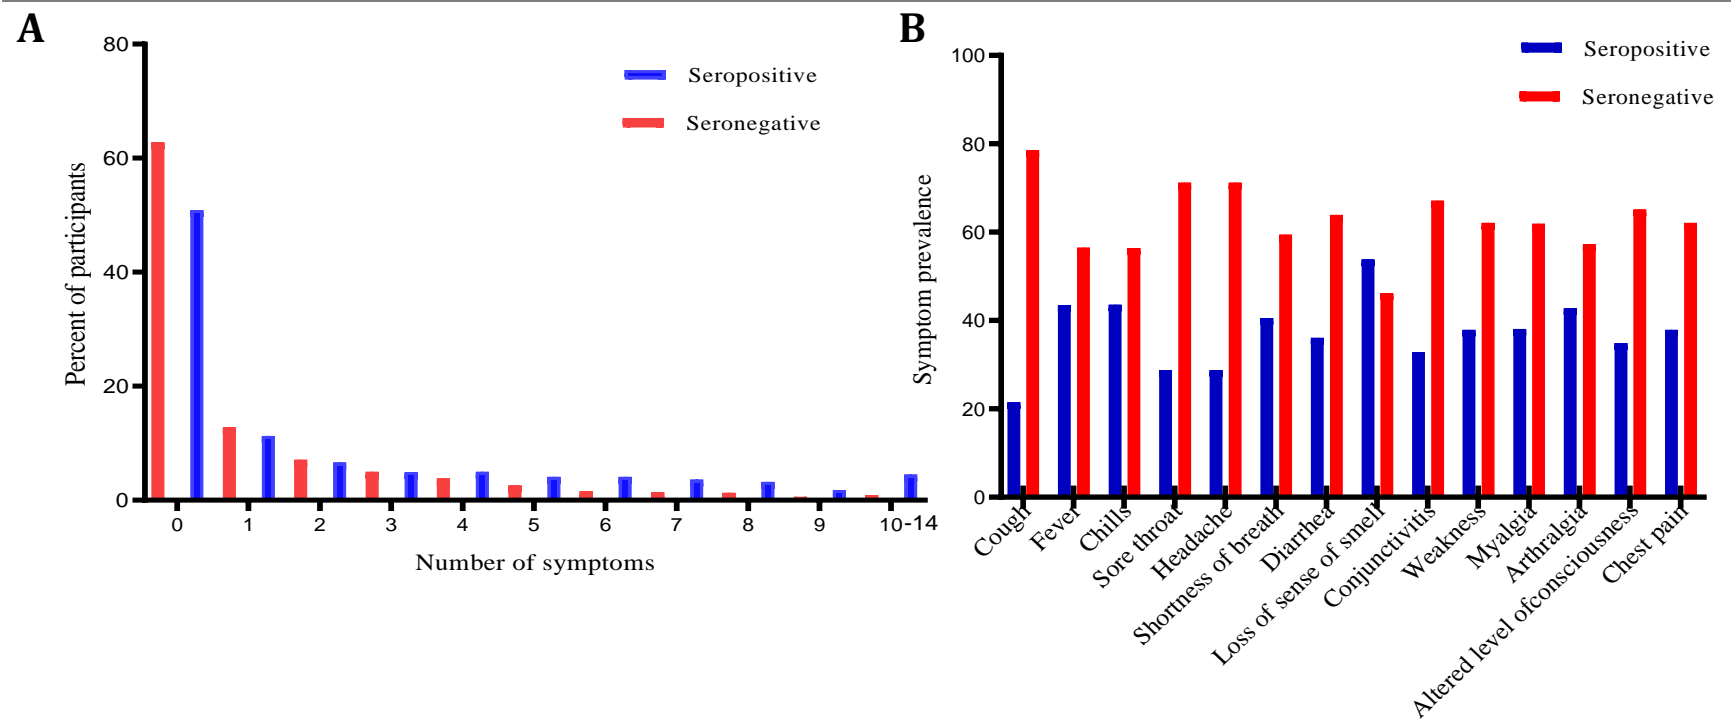

**Figure S3. Proportion of participants stratified by serotypes and number of symptoms (A) and type of symptoms (B).**

**Table S4. Frequency of symptoms among antibody positive compared to antibody negative individuals.**

| <b>Frequency (%)</b>                  | <b>Status</b>            | <b>Total,<br/>n (%)<br/>N=7355</b> | <b>Antibody positive,<br/>n (%)<br/>N=1746</b> | <b>Antibody negative,<br/>n (%)<br/>N=5609</b> |
|---------------------------------------|--------------------------|------------------------------------|------------------------------------------------|------------------------------------------------|
| <b>Cough</b>                          | Yes                      | 1054 (14.3)                        | 392 (22.5)                                     | 662 (11.8)                                     |
| <b>Fever</b>                          | Yes                      | 786 (10.7)                         | 341 (19.5)                                     | 445 (7.9)                                      |
| <b>Chills</b>                         | Yes                      | 669 (9.1)                          | 292 (16.7)                                     | 377 (6.7)                                      |
| <b>Loss of sense of smell</b>         | Yes                      | 586 (8.0)                          | 315 (18.0)                                     | 271 (4.8)                                      |
| <b>Sore throat</b>                    | Yes                      | 1179 (16.0)                        | 340 (19.5)                                     | 839 (15.0)                                     |
| <b>Headache</b>                       | Yes                      | 1498 (20.4)                        | 431 (24.7)                                     | 1067 (19.0)                                    |
| <b>Shortness of breath</b>            | Yes                      | 500 (6.8)                          | 203 (11.6)                                     | 297 (5.3)                                      |
| <b>Diarrhea</b>                       | Yes                      | 521 (7.1)                          | 188 (10.8)                                     | 333 (5.9)                                      |
| <b>Conjunctivitis</b>                 | Yes                      | 304 (4.1)                          | 100 (5.7)                                      | 204 (3.6)                                      |
| <b>Weakness</b>                       | Yes                      | 1099 (14.9)                        | 417 (23.9)                                     | 682 (12.2)                                     |
| <b>Myalgia</b>                        | Yes                      | 1012 (13.8)                        | 386 (22.1)                                     | 626 (11.2)                                     |
| <b>Arthralgia</b>                     | Yes                      | 533 (7.2)                          | 228 (13.1)                                     | 305 (5.4)                                      |
| <b>Altered level of consciousness</b> | Yes                      | 229 (3.1)                          | 80 (4.6)                                       | 149 (2.7)                                      |
| <b>Chest pain</b>                     | Yes                      | 396 (5.4)                          | 150 (8.6)                                      | 246 (4.4)                                      |
| <b>Prevalence of symptoms</b>         | Asymptomatic (0)         | 4409 (60.0)                        | 888 (50.9)                                     | 3521 (62.8)                                    |
|                                       | Paucisymptomatic (1-3)   | 1797 (24.4)                        | 398 (22.8)                                     | 1399 (24.9)                                    |
|                                       | Symptomatic ( $\geq 4$ ) | 1149 (15.6)                        | 460 (26.3)                                     | 689 (12.3)                                     |

Data are n, n (%), or n/N (%)

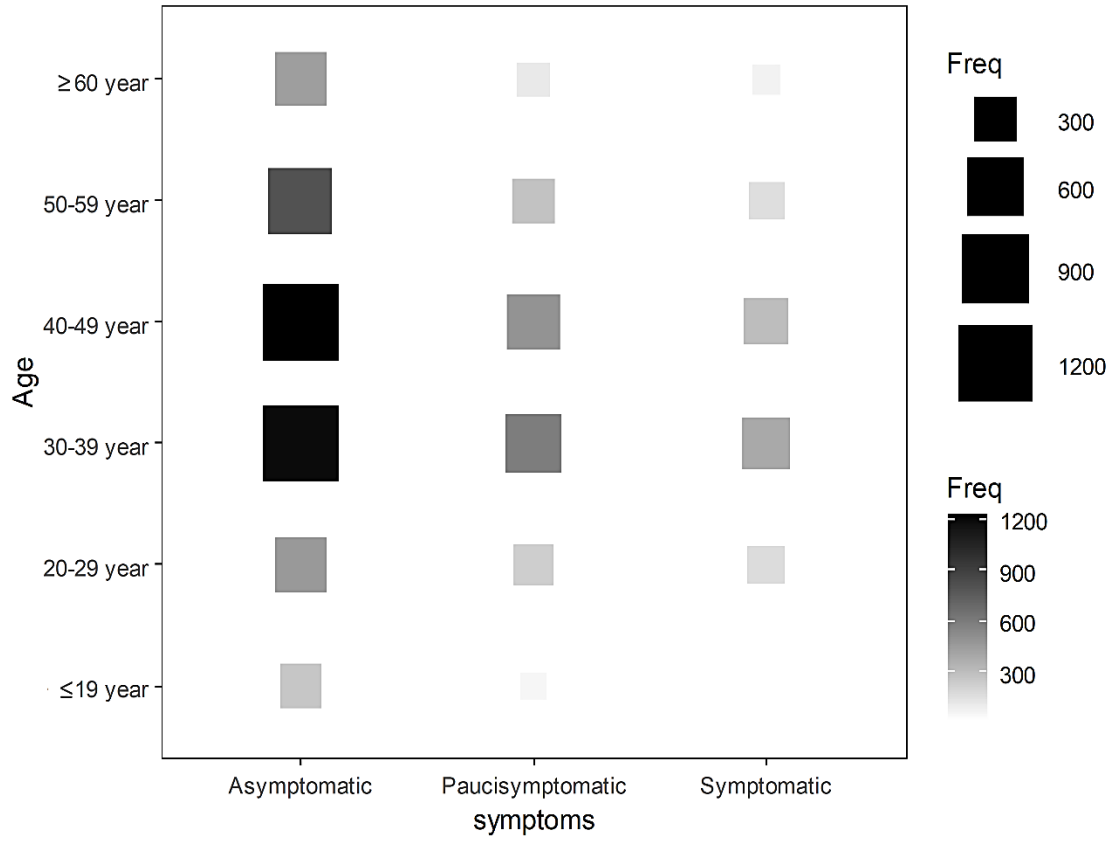

**Figure S4. Distribution of symptom categories by participants' age.**
